# Supplementary material for: Investigating Useful Properties of Four Streptomyces Strains Active against Fusarium graminearum Growth and Deoxynivalenol Production on Wheat Grains by qPCR
Source: MDPI journal article supplement (doi:10.3390/toxins12090560), 2020-08-31
Supplement: s1 [file s1]

|                    |                                                                                                                                                                                                         |     |     |                                                 |     |     |     |     |                                                                                                                                                                                                         |                                                                                                                                                                                      |
|--------------------|---------------------------------------------------------------------------------------------------------------------------------------------------------------------------------------------------------|-----|-----|-------------------------------------------------|-----|-----|-----|-----|---------------------------------------------------------------------------------------------------------------------------------------------------------------------------------------------------------|--------------------------------------------------------------------------------------------------------------------------------------------------------------------------------------|
| Consensus          | 1                                                                                                                                                                                                       | 10  | 20  | 30                                              | 40  | 50  | 60  | 70  | 80                                                                                                                                                                                                      | A G C C C R T C G A R G T C A T C C C C A C C G G R T C G A C C G C R C T S G A C G T C G C S C T C G G C G T C G G C G G Y C T G C C G C G C G G C C G K G T G G T G G A G          |
| 1. DEF48_recAF.ab1 | A G C C C A T C G A A G T C A T C C C C A C C G G G T C G A C C G C A C T C G A C G T C G C C C T C G G C G T C G G C G G C C T G C C G C G C G G C C G G G T G G T G G A G                             |     |     |                                                 |     |     |     |     |                                                                                                                                                                                                         |                                                                                                                                                                                      |
| 2. DEF20_recAF.ab1 | A G C C C A T C G A A G T C A T C C C C A C C G G G T C G A C C G C A C T C G A C G T C G C C C T C G G C G T C G G C G G C C T G C C G C G C G G C C G G G T G G T G G A G                             |     |     |                                                 |     |     |     |     |                                                                                                                                                                                                         |                                                                                                                                                                                      |
| 3. DEF39_recAF.ab1 | A G C C C A T C G A G G T C A T C C C C A C G G G A T C G A C C G C G C T G G A C G T C G C A C T C G G C G T C G G C G G T C T G C C G C G C G G C C G T T G T G G T G G A G                           |     |     |                                                 |     |     |     |     |                                                                                                                                                                                                         |                                                                                                                                                                                      |
| 4. DEF09_recAF.ab1 | A G C C C G T T G G A G G T C A T C C C C A C G G G A T C G A C C G C G C T G G A C G T C G C G C T C G G C G T C G G C G G T T C T G C C G C G C G G C C G T T G T G G T G G A G                       |     |     |                                                 |     |     |     |     |                                                                                                                                                                                                         |                                                                                                                                                                                      |
| Consensus          | 90                                                                                                                                                                                                      | 100 | 110 | 120                                             | 130 | 140 | 150 | 160 | 170                                                                                                                                                                                                     | G T G T A C G G R C C G G A G T C C T C C G G T A A G A C G A C S C T G A C S C T G C A C G C S G T G G C G A A C G C G C A G A A G S Y C G G C G G C Y M G G T S G C G T T          |
| 1. DEF48_recAF.ab1 | G T G T A C G G A C C G G A G T C C T C C G G T A A G A C G A C C C T G A C C C T G C A C G C C G T G G C G A A C G C G C A G A A G G C C G G C G G C C A G G T C G C G T T                             |     |     |                                                 |     |     |     |     |                                                                                                                                                                                                         |                                                                                                                                                                                      |
| 2. DEF20_recAF.ab1 | G T G T A C G G A C C G G A G T C C T C C G G T A A G A C G A C C C T G A C C C T G C A C G C C G T G G C G A A C G C G C A G A A G G C C G G C G G C C A G G T C G C G T T                             |     |     |                                                 |     |     |     |     |                                                                                                                                                                                                         |                                                                                                                                                                                      |
| 3. DEF39_recAF.ab1 | G T G T A C G G G C C G G A G T C C T C C G G T A A G A C G A C G C T G A C G C T G C A C G C G G T G G C G A A C G C G C A G A A G C T C G G C G G C T C G G T G G C G T T                             |     |     |                                                 |     |     |     |     |                                                                                                                                                                                                         |                                                                                                                                                                                      |
| 4. DEF09_recAF.ab1 | G T G T A C G G G C C G G A G T C C T C C G G C A A G A C G A C G C T G A C G C T G C A C G C G G T G G C G A A C G C G C A G A A G C T C G G C G G C T C G G T G G C G T T                             |     |     |                                                 |     |     |     |     |                                                                                                                                                                                                         |                                                                                                                                                                                      |
| Consensus          | 180                                                                                                                                                                                                     | 190 | 200 | 210                                             | 220 | 230 | 240 | 250 | C R T S G A C G C S G A G C A C G C S C T S G A C C C S G A G T A C G C G A A G A A G C T C G G C G T C G A C A T C G A C A A C C T S A T C C T S T C C C A G C C S G A C A                             |                                                                                                                                                                                      |
| 1. DEF48_recAF.ab1 | C G T T G G A C G C G G A G C A C G C C C T C G A C C C C G A G T A C G C G A A G A A G C T C G G C G T C G A C A T C G A C A A C C T G A T C C T C T C C C A G C C C G A C A                           |     |     |                                                 |     |     |     |     |                                                                                                                                                                                                         |                                                                                                                                                                                      |
| 2. DEF20_recAF.ab1 | C G T T G G A C G C G G A G C A C G C C C T C G A C C C C G A G T A C G C C A A G A A G C T C G G C G T C G A C A T C G A C A A C C T G A T C C T C T C C C A G C C C G A C A                           |     |     |                                                 |     |     |     |     |                                                                                                                                                                                                         |                                                                                                                                                                                      |
| 3. DEF39_recAF.ab1 | C A T C G A C G C C G A G C A C G C G C T G G A C C C G G A G T A C G C G A A G A A G C T C G G C G T C G A C A T C G A C A A C C T C A T C C T G T C C C A G C C G G A C A                             |     |     |                                                 |     |     |     |     |                                                                                                                                                                                                         |                                                                                                                                                                                      |
| 4. DEF09_recAF.ab1 | C A T C G A C G C C G A G C A C G C G C T G G A C C C G G A G T A C G C G A A G A A G C T C G G C G T C G A C A T C G A C A A C C T C A T C C T G T C C C A G C C G G A C A                             |     |     |                                                 |     |     |     |     |                                                                                                                                                                                                         |                                                                                                                                                                                      |
| Consensus          | 260                                                                                                                                                                                                     | 270 | 280 | 290                                             | 300 | 310 | 320 | 330 | 340                                                                                                                                                                                                     | A C G G Y G A G C A G G C S C T G G A G A T C G T S G A C A T G C T G G T S C G C T C C G G C G C S C T S G A C C T S A T C G T C A T C G A C T C C G T S G C C G C S C T S          |
| 1. DEF48_recAF.ab1 | A C G G C G A G C A G G C C C T G G A G A T C G T G G A C A T G C T G G T C G C T C C G G C G C C C T C G A C C T C A T C G T C A T C G A C T C C G T C G C C G C G C T C                               |     |     |                                                 |     |     |     |     |                                                                                                                                                                                                         |                                                                                                                                                                                      |
| 2. DEF20_recAF.ab1 | A C G G C G A G C A G G C C C T G G A G A T C G T G G A C A T G C T G G T C G C T C C G G C G C C C T C G A C C T C A T C G T C A T C G A C T C C G T C G C C G C G C T C                               |     |     |                                                 |     |     |     |     |                                                                                                                                                                                                         |                                                                                                                                                                                      |
| 3. DEF39_recAF.ab1 | A C G G T G A G C A G G C G C T G G A G A T C G T C G A C A T G C T G G T G C G C T C C G G C G C G C T G G A C C T G A T C G T C A T C G A C T C C G T G G C G G C C C T G                             |     |     |                                                 |     |     |     |     |                                                                                                                                                                                                         |                                                                                                                                                                                      |
| 4. DEF09_recAF.ab1 | A C G G T G A G C A G G C G C T G G A G A T C G T C G A C A T G C T G G T G C G C T C C G G C G C G C T G G A C C T G A T C G T C A T C G A C T C C G T G G C C G C C C T G                             |     |     |                                                 |     |     |     |     |                                                                                                                                                                                                         |                                                                                                                                                                                      |
| Consensus          | 350                                                                                                                                                                                                     | 360 | 370 | 380                                             | 390 | 400 | 410 | 420 | 430                                                                                                                                                                                                     | G T S C C S C G Y G C G G A G A T C G A G G G C G A G A T G G G C G A C W S S C A C G T S G G T C T C C A G G C C C G K C T G A T G A G C C A G G C S C T S C G S A A G A T qstr...> |
| 1. DEF48_recAF.ab1 | G T C C C G C G C G C G G A G A T C G A G G G C G A G A T G G G C G A C A G C C A C G T C G G T C T C C A G G C C C G G C T G A T G A G C C A G G C G C T G C G G A A G A T qstr...>                    |     |     |                                                 |     |     |     |     |                                                                                                                                                                                                         |                                                                                                                                                                                      |
| 2. DEF20_recAF.ab1 | G T C C C G C G C G C G G A G A T C G A G G G C G A G A T G G G C G A C A G C C A C G T C G G T C T C C A G G C C C G G C T G A T G A G C C A G G C G C T G C G G A A G A T qstr...>                    |     |     |                                                 |     |     |     |     |                                                                                                                                                                                                         |                                                                                                                                                                                      |
| 3. DEF39_recAF.ab1 | G T G C C C C G T T G C G G A G A T C G A G G G C G A G A T G G G C G A C T C G C A C G T G G G T C T C C A G G C C C G T C T G A T G A G C C A G G C C C T C C G C A A G A T qstr...>                  |     |     |                                                 |     |     |     |     |                                                                                                                                                                                                         |                                                                                                                                                                                      |
| 4. DEF09_recAF.ab1 | G T G C C C C G T T G C G G A G A T C G A G G G C G A G A T G G G C G A C T C G C A C G T G G G T C T C C A G G C C C G T C T G A T G A G C C A G G C C C T C C G C A A G A T qstr...>                  |     |     |                                                 |     |     |     |     |                                                                                                                                                                                                         |                                                                                                                                                                                      |
| Consensus          | 440                                                                                                                                                                                                     | 450 | 460 | 470                                             | 480 | 490 | 500 | 510 | C A C C A G T G C G C T C A A C C A G T C C A A G A C C A C C G C G A T C T T C A T C A A C C A G C T C C G C G A G A A G A T C G G C G T G A T G T T C G G C T C C C C G G qstreptoREcAF qstreptoREcAR |                                                                                                                                                                                      |
| 1. DEF48_recAF.ab1 | C A C C A G T G C G C T C A A C C A G T C C A A G A C C A C C G C G A T C T T C A T C A A C C A G C T C C G C G A G A A G A T C G G C G T G A T G T T C G G C T C C C C G G qstreptoREcAF qstreptoREcAR |     |     |                                                 |     |     |     |     |                                                                                                                                                                                                         |                                                                                                                                                                                      |
| 2. DEF20_recAF.ab1 | C A C C A G T G C G C T C A A C C A G T C C A A G A C C A C C G C G A T C T T C A T C A A C C A G C T C C G C G A G A A G A T C G G C G T G A T G T T C G G C T C C C C G G qstreptoREcAF qstreptoREcAR |     |     |                                                 |     |     |     |     |                                                                                                                                                                                                         |                                                                                                                                                                                      |
| 3. DEF39_recAF.ab1 | C A C C A G T G C G C T C A A C C A G T C C A A G A C C A C C G C G A T C T T C A T C A A C C A G C T C C G C G A G A A G A T C G G C G T G A T G T T C G G C T C C C C G G qstreptoREcAF qstreptoREcAR |     |     |                                                 |     |     |     |     |                                                                                                                                                                                                         |                                                                                                                                                                                      |
| 4. DEF09_recAF.ab1 | C A C C A G T G C G C T C A A C C A G T C C A A G A C C A C C G C G A T C T T C A T C A A C C A G C T C C G C G A G A A G A T C G G C G T G A T G T T C G G C T C C C C G G qstreptoREcAF qstreptoREcAR |     |     |                                                 |     |     |     |     |                                                                                                                                                                                                         |                                                                                                                                                                                      |
| Consensus          | 520                                                                                                                                                                                                     | 530 | 540 | 550                                             | 560 | 570 | 580 | 590 | 600                                                                                                                                                                                                     | A G A C C A C S A C C G G T G G C C G G G C G C T G A A G T T C T A C G C C T C G G T G C G S C T C G A C A T C C G C C G S A T C G A G A C S C T C A A G G A C G G C A C C          |
| 1. DEF48_recAF.ab1 | A G A C C A C G A C C G G T G G C C G G G C G C T G A A G T T C T A C G C C T C G G T G C G G C T C G A C A T C C G C C G C A T C G A G A C C C T C A A G G A C G G C A C C                             |     |     |                                                 |     |     |     |     |                                                                                                                                                                                                         |                                                                                                                                                                                      |
| 2. DEF20_recAF.ab1 | A G A C C A C G A C C G G T G G C C G G G C G C T G A A G T T C T A C G C C T C G G T G C G G C T C G A C A T C C G C C G C A T C G A G A C C C T C A A G G A C G G C A C C                             |     |     |                                                 |     |     |     |     |                                                                                                                                                                                                         |                                                                                                                                                                                      |
| 3. DEF39_recAF.ab1 | A G A C C A C C A C C G G T G G C C G G G C G C T G A A G T T C T A C G C C T C G G T G C G C C T C G A C A T C C G C C G G A T C G A G A C G C T C A A G G A C G G C A C C                             |     |     |                                                 |     |     |     |     |                                                                                                                                                                                                         |                                                                                                                                                                                      |
| 4. DEF09_recAF.ab1 | A G A C C A C C A C C G G T G G C C G G G C G C T G A A G T T C T A C G C C T C G G T G C G C C T C G A C A T C C G C C G G A T C G A G A C G C T C A A G G A C G G C A C C                             |     |     |                                                 |     |     |     |     |                                                                                                                                                                                                         |                                                                                                                                                                                      |
| Consensus          | 610                                                                                                                                                                                                     | 620 | 630 | 640                                             | 650 | 660 | 670 | 680 | G A C G C S G T C G G C A A C C G C A C C C G C G T C A A G G T C G T C A A G A A C A A G G T C G C S C C G C C S T T C A A G C A G G C S G A G T T C G A C A T C C T C T A                             |                                                                                                                                                                                      |
| 1. DEF48_recAF.ab1 | G A C G C G G T C G G C A A C C G C A C C C G C G T C A A G G T C G T C A A G A A C A A G G T C G C G C C G C T T C A A G C A G G C C G A G T T C G A C A T C C T C T A                                 |     |     |                                                 |     |     |     |     |                                                                                                                                                                                                         |                                                                                                                                                                                      |
| 2. DEF20_recAF.ab1 | G A C G C G G T C G G C A A C C G C A C C C G C G T C A A G G T C G T C A A G A A C A A G G T C G C G C C G C T T C A A G C A G G C C G A G T T C G A C A T C C T C T A                                 |     |     |                                                 |     |     |     |     |                                                                                                                                                                                                         |                                                                                                                                                                                      |
| 3. DEF39_recAF.ab1 | G A C G C C G T C G G C A A C C G C A C C C G C G T C A A G G T C G T C A A G A A C A A G G T C G C C C G C C G T T C A A G C A G G C G G A G T T C G A C A T C C T C T A                               |     |     |                                                 |     |     |     |     |                                                                                                                                                                                                         |                                                                                                                                                                                      |
| 4. DEF09_recAF.ab1 | G A C G C C G T C G G C A A C C G C A C C C G C G T C A A G G T C G T C A A G A A C A A G G T C G C C C G C C G T T C A A G C A G G C G G A G T T C G A C A T C C T C T A                               |     |     |                                                 |     |     |     |     |                                                                                                                                                                                                         |                                                                                                                                                                                      |
| Consensus          | 690                                                                                                                                                                                                     | 700 | 710 | 720                                             | 730 | 740 | 750 | 760 | 770                                                                                                                                                                                                     | C G G C C A G G G C A T C A G C C G C G A G G G C G G Y C T G A T C G A C A T G G G C G T G G A G M A C G G C T T C G T C C G C A A G G C C G G C G C C T G G T A C A C G T          |
| 1. DEF48_recAF.ab1 | C G G C C A G G G C A T C A G C C G C G A G G G C G G C C T G A T C G A C A T G G G C G T G G A G A A C G G C T T C G T C C G C A A G G C C G G C G C C T G G T A C A C G T                             |     |     |                                                 |     |     |     |     |                                                                                                                                                                                                         |                                                                                                                                                                                      |
| 2. DEF20_recAF.ab1 | C G G C C A G G G C A T C A G C C G C G A G G G C G G C C T G A T C G A C A T G G G C G T G G A G A A C G G C T T C G T C C G C A A G G C C G G C G C C T G G T A C A C G T                             |     |     |                                                 |     |     |     |     |                                                                                                                                                                                                         |                                                                                                                                                                                      |
| 3. DEF39_recAF.ab1 | C G G C C A G G G C A T C A G C C G C G A G G G C G G T C T G A T C G A C A T G G G C G T G G A C C A C G G C T T C G T C C G C A A G G C C G G C G C C T G G T A C A C G T                             |     |     |                                                 |     |     |     |     |                                                                                                                                                                                                         |                                                                                                                                                                                      |
| 4. DEF09_recAF.ab1 | C G G C C A G G G C A T C A G C C G T G A G G G C G G T C T G A T C G A C A T G G G C G T G G A G C A C G G C T T C G T C C G C A A G G C C G G C G C C T G G T A C A C G T                             |     |     |                                                 |     |     |     |     |                                                                                                                                                                                                         |                                                                                                                                                                                      |
| Consensus          | 780                                                                                                                                                                                                     | 790 | 798 | A C G A G G G C G A C C A G C T C G G C C A G G |     |     |     |     |                                                                                                                                                                                                         |                                                                                                                                                                                      |
| 1. DEF48_recAF.ab1 | A C G A G G G C G A C C A G C T C G G C C A G G                                                                                                                                                         |     |     |                                                 |     |     |     |     |                                                                                                                                                                                                         |                                                                                                                                                                                      |
| 2. DEF20_recAF.ab1 | A C G A G G G C G A C C A G C T C G G C C A G G                                                                                                                                                         |     |     |                                                 |     |     |     |     |                                                                                                                                                                                                         |                                                                                                                                                                                      |
| 3. DEF39_recAF.ab1 | A C G A G G G C G A T C A G C T C G G C C A G G                                                                                                                                                         |     |     |                                                 |     |     |     |     |                                                                                                                                                                                                         |                                                                                                                                                                                      |
| 4. DEF09_recAF.ab1 | A C G A G G G C G A C C A G C T C G G C C A G G                                                                                                                                                         |     |     |                                                 |     |     |     |     |                                                                                                                                                                                                         |                                                                                                                                                                                      |
