# Supplementary material for: Investigating Useful Properties of Four Streptomyces Strains Active against Fusarium graminearum Growth and Deoxynivalenol Production on Wheat Grains by qPCR
Source: MDPI journal article supplement (doi:10.3390/toxins12090560), 2020-08-31
Supplement: s1 [file s1]

## Supplementary Materials: Investigating Useful Properties of Four *Streptomyces* Strains Active Against *Fusarium graminearum* Growth and Deoxynivalenol Production on Wheat Grains by qPCR

Elena Maria Colombo, Andrea Kunova, Claudio Gardana, Cristina Pizzatti, Paolo Simonetti, Paolo Cortesi, Marco Saracchi and Matias Pasquali

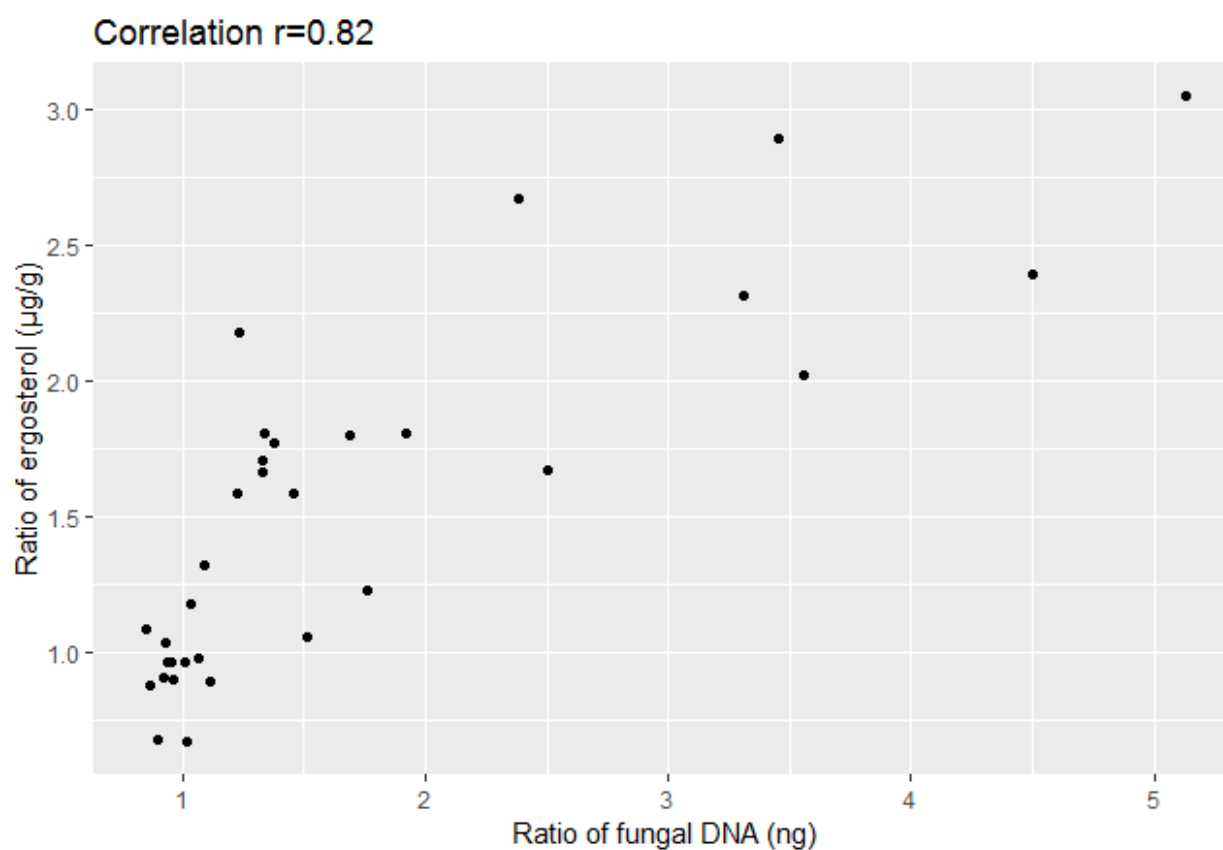

**Figure S1.** Scatter plot of ratios calculated between total ng of fungal DNA in control and treated samples and ratios of ergosterol ( $\mu\text{g/g}$ ) in control and treated samples.

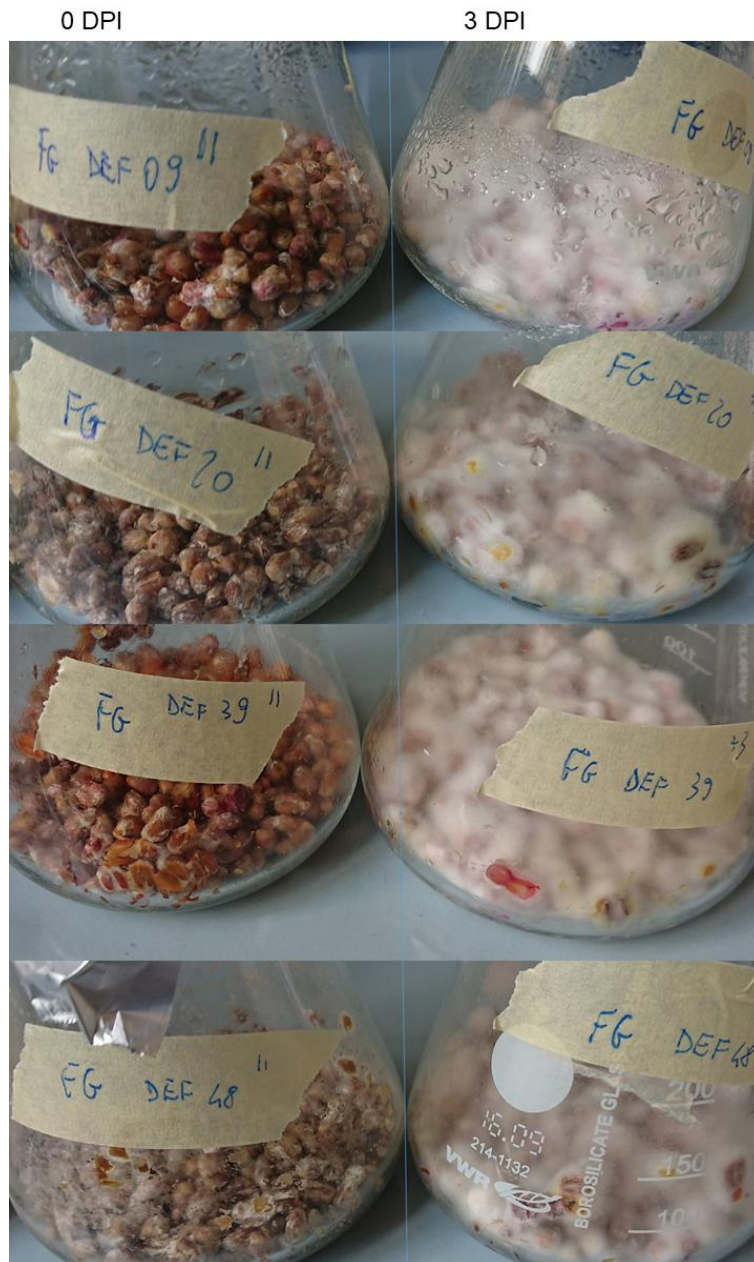

**Figure S2.** *Fusarium graminearum* growth in the flasks on wheat grains after co-inoculation (0 DPI) and late inoculation (3 DPI) with *Streptomyces* spp. strains DEF09, DEF20, DEF39 and DEF 48 after 11 days of incubation.

**Table S1.** TRI12 and ergosterol quantification in blank samples (no-*Fusarium* or *Streptomyces* inoculation).

| Name of Blank Samples | TRI12 (ng)   | Ergosterol (µg/g) |
|-----------------------|--------------|-------------------|
| Q32                   | 0.02         | 0.00              |
| Q49                   | Undetermined | 0.00              |
| Q74                   | Undetermined | 0.00              |
| Q105                  | Undetermined | 0.00              |

**Table S2.** *P*-values of ANOVA analyses, comparing the effects of BCA treatments on fungal biomass detection by the two analysis methods (ergosterol and qPCR). In addition, results from Tukey's HSD post hoc comparison are listed as significant difference ( $P < 0.05$ ) of the amount of ergosterol or fungal abundance in comparison with untreated control (no-*Streptomyces* inoculation).

| <i>Streptomyces</i><br>Strain | Fungal<br>Treatment | Time of BCA<br>Inoculation | <i>P</i> -value<br>ANOVA<br>Ergosterol | Tukey's HSD<br>test<br>(Ergosterol) | <i>P</i> -value<br>ANOVA<br>qPCR | Tukey's HSD<br>Test<br>(Abundance) |
|-------------------------------|---------------------|----------------------------|----------------------------------------|-------------------------------------|----------------------------------|------------------------------------|
| DEF09                         | CS3005              | 3 DPI                      | 0.043*                                 | =                                   | 0.29                             | =                                  |
| DEF39                         | CS3005              | 3 DPI                      | 0.043*                                 | =                                   | 0.29                             | =                                  |
| DEF20                         | CS3005              | 3 DPI                      | 0.70                                   | =                                   | 0.44                             | =                                  |
| DEF48                         | CS3005              | 3 DPI                      | 0.70                                   | =                                   | 0.44                             | =                                  |
| DEF09                         | CS3005              | 0 DPI                      | 4.42e-06*                              | -                                   | 0.01*                            | -                                  |
| DEF39                         | CS3005              | 0 DPI                      | 4.42e-06*                              | -                                   | 0.01*                            | -                                  |
| DEF20                         | CS3005              | 0 DPI                      | 0.00*                                  | -                                   | 0.01*                            | -                                  |
| DEF48                         | CS3005              | 0 DPI                      | 0.00*                                  | -                                   | 0.01*                            | -                                  |

= amount equal to control samples; - amount decreased in comparison to control samples; \* $p < 0.05$  is considered significant.
