# Supplementary material for: Investigating Useful Properties of Four Streptomyces Strains Active against Fusarium graminearum Growth and Deoxynivalenol Production on Wheat Grains by qPCR
Source: MDPI journal article supplement (doi:10.3390/toxins12090560), 2020-08-31
Supplement: s1 [file s1]

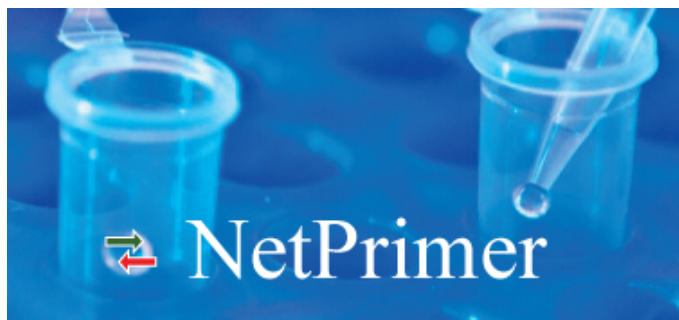

Free web  
based tool to  
analyze  
primers

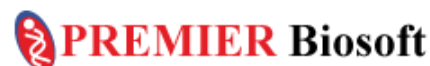

## Oligo Analysis

|             |   |  |
|-------------|---|--|
| Name        | : |  |
| Description | : |  |

## Sequence #1 (5' to 3')

|                      |   |    |
|----------------------|---|----|
| Length               | : | 20 |
| AAGATCACCAGTGCGCTCAA |   |    |

## Sequence #2 (5' to 3')

|                       |   |    |
|-----------------------|---|----|
| Length                | : | 21 |
| GAGCTGGTTGATGAAGATCGC |   |    |

## Reaction Conditions

|                                         |   |        |    |
|-----------------------------------------|---|--------|----|
| Oligo Concentration                     | : | 250.0  | pM |
| Monovalent Ion Concentration            | : | 50.0   | mM |
| Free Mg++ Ion Concentration             | : | 1.5    | mM |
| Total Na[+] Equivalent                  | : | 204.92 | mM |
| Temperature for Free Energy Calculation | : | 25.0   | °C |

Default

Analyze

## Analysis Results #1: AAGATCACCAGTGCGCTCAA

|                       |   |         |          |                      |   |              |             |
|-----------------------|---|---------|----------|----------------------|---|--------------|-------------|
| Rating                | : | 82.0    |          | 3' end stability     | : | -7.07        | kcal/mol    |
| Molecular Wt          | : | 6095.07 |          | ΔH                   | : | -148.3       | kcal/mol    |
| Tm                    | : | 58.87   | °C       | ΔS                   | : | -0.38        | kcal/°K/mol |
| GC%                   | : | 50.0    |          | 5' end ΔG            | : | -6.59        | kcal/mol    |
| GC Clamp              | : | 1       |          | Self Dimer ( ΔG)     | : | <u>-9.89</u> | kcal/mol    |
| nmol/A <sub>260</sub> | : | 5.04    |          | Hairpin ( ΔG)        | : |              | kcal/mol    |
| ug/A <sub>260</sub>   | : | 30.71   |          | Repeats (# of pairs) | : |              | kcal/mol    |
| ΔG                    | : | -33.84  | kcal/mol | Run (# of bases)     | : |              | kcal/mol    |

## Analysis Results #2: GAGCTGGTTGATGAAGATCGC

|                       |   |         |          |                      |   |              |             |
|-----------------------|---|---------|----------|----------------------|---|--------------|-------------|
| Rating                | : | 88.0    |          | 3' end stability     | : | -9.8         | kcal/mol    |
| Molecular Wt          | : | 6526.32 |          | ΔH                   | : | -155.8       | kcal/mol    |
| Tm                    | : | 59.69   | °C       | ΔS                   | : | -0.4         | kcal/°K/mol |
| GC%                   | : | 52.38   |          | 5' end ΔG            | : | -7.91        | kcal/mol    |
| GC Clamp              | : | 3       |          | Self Dimer ( ΔG)     | : | <u>-6.34</u> | kcal/mol    |
| nmol/A <sub>260</sub> | : | 4.81    |          | Hairpin ( ΔG)        | : |              | kcal/mol    |
| ug/A <sub>260</sub>   | : | 31.38   |          | Repeats (# of pairs) | : |              | kcal/mol    |
| ΔG                    | : | -35.17  | kcal/mol | Run (# of bases)     | : |              | kcal/mol    |

|                  |   |              |          |
|------------------|---|--------------|----------|
| Cross Dimer (ΔG) | : | <u>-7.96</u> | kcal/mol |
|------------------|---|--------------|----------|

Print

Copyright ©2019 PREMIER Biosoft. All rights reserved.
