# Supplementary material for: Investigating Useful Properties of Four Streptomyces Strains Active against Fusarium graminearum Growth and Deoxynivalenol Production on Wheat Grains by qPCR
Source: MDPI journal article supplement (doi:10.3390/toxins12090560), 2020-08-31
Supplement: s1 [file s1]

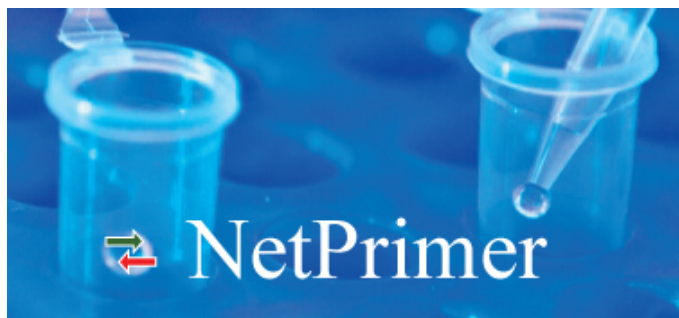

Free web  
based tool to  
analyze  
primers

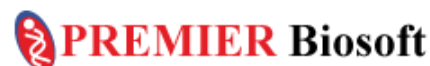

## Oligo Analysis

|             |   |                      |
|-------------|---|----------------------|
| Name        | : | <input type="text"/> |
| Description | : | <input type="text"/> |

## Sequence #1 (5' to 3')

|                                                   |   |                                 |
|---------------------------------------------------|---|---------------------------------|
| Length                                            | : | <input type="text" value="20"/> |
| <input type="text" value="ATCTCAGCCAGACGACAGGT"/> |   |                                 |

## Sequence #2 (5' to 3')

|                                                   |   |                                 |
|---------------------------------------------------|---|---------------------------------|
| Length                                            | : | <input type="text" value="20"/> |
| <input type="text" value="CGAGGCGAGGTGTAATATCC"/> |   |                                 |

## Reaction Conditions

|                                         |   |                                     |    |
|-----------------------------------------|---|-------------------------------------|----|
| Oligo Concentration                     | : | <input type="text" value="250.0"/>  | pM |
| Monovalent Ion Concentration            | : | <input type="text" value="50.0"/>   | mM |
| Free Mg++ Ion Concentration             | : | <input type="text" value="1.5"/>    | mM |
| Total Na[+] Equivalent                  | : | <input type="text" value="204.92"/> | mM |
| Temperature for Free Energy Calculation | : | <input type="text" value="25.0"/>   | °C |

Default

Analyze

## Analysis Results #1: ATCTCAGCCAGACGACAGGT

|                       |   |         |          |                      |   |        |             |
|-----------------------|---|---------|----------|----------------------|---|--------|-------------|
| Rating                | : | 100.0   |          | 3' end stability     | : | -7.96  | kcal/mol    |
| Molecular Wt          | : | 6111.07 |          | ΔH                   | : | -144.1 | kcal/mol    |
| Tm                    | : | 56.58   | °C       | ΔS                   | : | -0.37  | kcal/°K/mol |
| GC%                   | : | 55.0    |          | 5' end ΔG            | : | -6.22  | kcal/mol    |
| GC Clamp              | : | 2       |          | Self Dimer ( ΔG)     | : |        | kcal/mol    |
| nmol/A <sub>260</sub> | : | 5.07    |          | Hairpin ( ΔG)        | : |        | kcal/mol    |
| ug/A <sub>260</sub>   | : | 30.97   |          | Repeats (# of pairs) | : |        | kcal/mol    |
| ΔG                    | : | -32.44  | kcal/mol | Run (# of bases)     | : |        | kcal/mol    |

## Analysis Results #2: CGAGGCGAGGTGTAATATCC

|                       |   |        |          |                      |   |              |             |
|-----------------------|---|--------|----------|----------------------|---|--------------|-------------|
| Rating                | : | 91.0   |          | 3' end stability     | : | -7.08        | kcal/mol    |
| Molecular Wt          | : | 6182.1 |          | ΔH                   | : | -157.4       | kcal/mol    |
| Tm                    | : | 57.31  | °C       | ΔS                   | : | -0.41        | kcal/°K/mol |
| GC%                   | : | 55.0   |          | 5' end ΔG            | : | -9.85        | kcal/mol    |
| GC Clamp              | : | 2      |          | Self Dimer ( ΔG)     | : | <u>-4.91</u> | kcal/mol    |
| nmol/A <sub>260</sub> | : | 5.01   |          | Hairpin ( ΔG)        | : |              | kcal/mol    |
| ug/A <sub>260</sub>   | : | 30.96  |          | Repeats (# of pairs) | : |              | kcal/mol    |
| ΔG                    | : | -34.44 | kcal/mol | Run (# of bases)     | : |              | kcal/mol    |

|                  |   |                      |          |
|------------------|---|----------------------|----------|
| Cross Dimer (ΔG) | : | <input type="text"/> | kcal/mol |
|------------------|---|----------------------|----------|

Print

Copyright ©2019 PREMIER Biosoft. All rights reserved.
